# Supplementary material for: Selective recognition of Hg2+ ions in aqueous solution by a CdII-based metal–organic framework with good stability and vacant coordination sites
Source: Royal Society of Chemistry journal article supplement (doi:10.1039/d2dt03386k), 2022-12-05
Supplement: d2dt03386k1.pdf [file d2dt03386k1.pdf]

## ***Electronic Supplementary Information (ESI)***

### **Selective recognition of Hg<sup>2+</sup> ions in aqueous solution by a Cd<sup>II</sup>-based metal-organic framework with good stability and vacant coordination sites**

**Xiao-Qin Cao,<sup>a</sup> Wei-Peng Wu,<sup>a</sup> Qiang Li,<sup>a</sup> Teng-Fei Zheng,<sup>a</sup> Yong-Qiang Chen,<sup>b\*</sup> Jing-Lin Chen,<sup>a</sup> Sui-Jun Liu,<sup>a\*</sup> and He-Rui Wen<sup>a</sup>**

<sup>a</sup>School of Chemistry and Chemical Engineering, Jiangxi Provincial Key Laboratory of Functional Molecular Materials Chemistry, Jiangxi University of Science and Technology, Ganzhou 341000, Jiangxi Province, P.R. China

<sup>b</sup>Department of Chemistry and Chemical Engineering, Jinzhong University, Jinzhong 030619, Shanxi Province, P.R. China

---

\*Corresponding authors. E-mail: sjliu@jxust.edu.cn (S.-J. Liu), chenyonqiang@jzxy.edu.cn (Y.-Q. Chen)

**Table S1.** Crystal data and structure refinements for **JXUST-28**.

| Complex                                                                             | JXUST-28                                                                        |
|-------------------------------------------------------------------------------------|---------------------------------------------------------------------------------|
| formula                                                                             | C <sub>18</sub> H <sub>12</sub> N <sub>6</sub> O <sub>6</sub> S <sub>2</sub> Cd |
| <i>M<sub>r</sub></i>                                                                | 584.82                                                                          |
| <i>T</i> (K)                                                                        | 293(2)                                                                          |
| crystal system                                                                      | Triclinic                                                                       |
| space group                                                                         | $\bar{P}1$                                                                      |
| <i>a</i> (Å)                                                                        | 10.1318(3)                                                                      |
| <i>b</i> (Å)                                                                        | 10.4983(3)                                                                      |
| <i>c</i> (Å)                                                                        | 10.9116(3)                                                                      |
| $\alpha$ (°)                                                                        | 105.487(1)                                                                      |
| $\beta$ (°)                                                                         | 97.662(1)                                                                       |
| $\gamma$ (°)                                                                        | 99.918(1)                                                                       |
| <i>V</i> (Å <sup>3</sup> )                                                          | 1082.09(5)                                                                      |
| <i>Z</i>                                                                            | 2                                                                               |
| <i>F</i> (000)                                                                      | 572.0                                                                           |
| <i>D</i> <sub>calc</sub> (g cm <sup>-3</sup> )                                      | 1.783                                                                           |
| $\mu$ (mm <sup>-1</sup> )                                                           | 1.251                                                                           |
| Reflections collected/unique                                                        | 13525/3779                                                                      |
| <i>R</i> <sub>int</sub>                                                             | 0.0177                                                                          |
| <i>R</i> <sub>1</sub> <sup>a</sup> / <i>wR</i> <sub>2</sub> <sup>b</sup> [I>2σ(I)]  | 0.0357/0.1074                                                                   |
| <i>R</i> <sub>1</sub> <sup>a</sup> / <i>wR</i> <sub>2</sub> <sup>b</sup> (all data) | 0.0382/0.1099                                                                   |
| GOF on <i>F</i> <sup>2</sup>                                                        | 1.086                                                                           |

$${}^aR_1 = \Sigma(|F_0| - |F_C|)/\Sigma|F_0|. \quad {}^b wR_2 = [\Sigma w(|F_0|^2 - |F_C|^2)^2 / (\Sigma w|F_0|^2)^2]^{1/2}.$$

**Table S2.** Selected bond lengths (Å) and angles (°) for **JXUST-28**<sup>a</sup>

|                                         |            |                                         |            |
|-----------------------------------------|------------|-----------------------------------------|------------|
| Cd1—O1                                  | 2.239(3)   | Cd1—O2                                  | 2.648(4)   |
| Cd1—N1 <sup>i</sup>                     | 2.299(4)   | Cd1—O4 <sup>ii</sup>                    | 2.345(3)   |
| Cd1—N4                                  | 2.301(4)   | O3—Cd1 <sup>v</sup>                     | 2.499(3)   |
| Cd1—O3 <sup>iii</sup>                   | 2.418(3)   | O3—Cd1 <sup>iii</sup>                   | 2.418(3)   |
| Cd1—O3 <sup>ii</sup>                    | 2.499(3)   | N1—Cd1 <sup>iv</sup>                    | 2.299(4)   |
| O1—Cd1—N1 <sup>i</sup>                  | 89.38(15)  | N1 <sup>i</sup> —Cd1—O2                 | 95.10(15)  |
| O1—Cd1—O2                               | 52.29(12)  | N1 <sup>i</sup> —Cd1—O4 <sup>ii</sup>   | 94.83(13)  |
| O1—Cd1—O4 <sup>ii</sup>                 | 140.82(12) | N1 <sup>i</sup> —Cd1—N4                 | 176.36(14) |
| O1—Cd1—N4                               | 93.61(15)  | N1 <sup>i</sup> —Cd1—O3 <sup>iii</sup>  | 89.20(13)  |
| O1—Cd1—O3 <sup>ii</sup>                 | 165.16(12) | N1 <sup>i</sup> —Cd1—O3 <sup>ii</sup>   | 86.44(13)  |
| O1—Cd1—O3 <sup>iii</sup>                | 87.64(12)  | N4—Cd1—O2                               | 88.37(15)  |
| O4 <sup>ii</sup> —Cd1—O2                | 88.53(11)  | N4—Cd1—O4 <sup>ii</sup>                 | 84.16(13)  |
| O4 <sup>ii</sup> —Cd1—O3 <sup>ii</sup>  | 53.86(11)  | N4—Cd1—O3 <sup>iii</sup>                | 88.85(13)  |
| O4 <sup>ii</sup> —Cd1—O3 <sup>iii</sup> | 131.27(11) | N4—Cd1—O3 <sup>ii</sup>                 | 90.16(13)  |
| O3 <sup>iii</sup> —Cd1—O2               | 139.52(11) | O3 <sup>iii</sup> —Cd1—O3 <sup>ii</sup> | 78.08(12)  |
| O3 <sup>ii</sup> —Cd1—O2                | 142.29(11) |                                         |            |

<sup>a</sup>Symmetry codes: (i)  $x-1, y, z-1$ ; (ii)  $x, y-1, z$ ; (iii)  $-x, -y+2, -z$ ; (iv)  $x+1, y, z+1$ ; (v)  $x, y+1, z$ .

**Table S3.** SHAPE analysis of Cd<sup>II</sup> ion in **JXUST-28**.

| ion        | label   | shape                                   | sym      | distortion( $\tau$ ) |
|------------|---------|-----------------------------------------|----------|----------------------|
|            | HP-7    | Heptagon                                | $D_{7h}$ | 30.173               |
|            | HPY-7   | Hexagonal pyramid                       | $C_{6v}$ | 21.608               |
|            | PBPY-7  | Pentagonal bipyramid                    | $D_{5h}$ | <b>2.030</b>         |
| <b>Cd1</b> | COC-7   | Capped octahedron                       | $C_{3v}$ | 9.042                |
|            | CTPR-7  | Capped trigonal prism                   | $C_{2v}$ | 6.911                |
|            | JBPY-7  | Johnson pentagonal bipyramid J13        | $D_{5h}$ | 4.857                |
|            | JETPY-7 | Johnson elongated triangular pyramid J7 | $C_{3v}$ | 20.558               |

**Table S4.** The summary of the stability of some representative materials for the recognition and removal of Hg<sup>2+</sup>.

| Materials                                                                                 | Metal Ion | Testing condition                                                                                                                                                            | Stability                                                                                         | Ref.      |
|-------------------------------------------------------------------------------------------|-----------|------------------------------------------------------------------------------------------------------------------------------------------------------------------------------|---------------------------------------------------------------------------------------------------|-----------|
| NH <sub>2</sub> -MIL-53(Al)                                                               | Al(III)   | pH = 1-14 (8 h)                                                                                                                                                              | acid-base stability                                                                               | S1        |
| AH-COF                                                                                    |           | pH = 3-13<br>solvents (CHCl <sub>3</sub> , THF, DMF, DMSO, acetone, H <sub>2</sub> O)                                                                                        | acid-base stability<br>thermal stability (300 °C)<br>solvent stability                            | S2        |
| {[Zn(L)(A)]·DMF} <sub>n</sub>                                                             | Zn(II)    | pH = 3-11<br>organic solvents (EtOH, acetone, MeOH, MeCN, THF, DMF, DMA, 1,4-dioxane) (12h)                                                                                  | water stability<br>thermal stability (300 °C)<br>organic solvent stability<br>acid base stability | S3        |
| Zn-TPTC                                                                                   | Zn(II)    |                                                                                                                                                                              | thermal stability (350 °C)                                                                        | S4        |
| Tb(TATAB)·(DMF) <sub>4</sub> (H <sub>2</sub> O)<br>(MeOH) <sub>0.5</sub>                  | Tb(III)   |                                                                                                                                                                              | water stability                                                                                   | S5        |
| UiO-66@Butyne                                                                             | Zr(IV)    | H <sub>2</sub> O, acetone, benzene, DMF (24 h)                                                                                                                               | solvent stability                                                                                 | S6        |
| {[Ni <sub>1.5</sub> (L)(4,4'-azobpy)(H <sub>2</sub> O)]·6.5H <sub>2</sub> O} <sub>n</sub> | Ni(II)    | pH = 1-14 (48 h), solvents (DMF, CH <sub>3</sub> CN, THF, CH <sub>2</sub> Cl <sub>2</sub> , CH <sub>3</sub> COCH <sub>3</sub> , H <sub>2</sub> O, CH <sub>3</sub> CN) (48 h) | solvent stability<br>acid-base stability                                                          | S7        |
| RuUiO-67                                                                                  | Zr(IV)    |                                                                                                                                                                              | chemical stability                                                                                | S8        |
| Tb <sub>0.6</sub> Eu <sub>0.4</sub> -bop nanosheets                                       | Ln(III)   |                                                                                                                                                                              | thermal stability (460 °C)<br>chemical stability                                                  | S9        |
| TMU-31, TMU-32                                                                            | Zn(II)    | water-stability (3 days)                                                                                                                                                     | water-stability                                                                                   | S10       |
| Zn-MOF                                                                                    | Zn(II)    | pH = 3-7 (24 h)                                                                                                                                                              | acid-base stability                                                                               | S11       |
| <b>JXUST-28</b>                                                                           | Cd(II)    | boiling water (5 d)<br>pH = 2-12 (24 h)<br>solvents (CH <sub>2</sub> Cl <sub>2</sub> , DMF, DMAc, MeOH, THF, MeCN, EtOH, H <sub>2</sub> O and acetone) (24 h)                | thermal stability (370 °C)<br>boiling water stability<br>solvent stability<br>acid-base stability | This work |

**Table S5.** Comparison of different MOF materials for detecting Hg<sup>2+</sup>

| <b>Sensors</b>                                                                    | <b>Limit of detection (LOD)</b> | <b>Ref.</b> |
|-----------------------------------------------------------------------------------|---------------------------------|-------------|
| NH <sub>2</sub> -MIL-53(Al)                                                       | 1.5×10 <sup>-9</sup> M          | S1          |
| RuUiO-67                                                                          | 5.0×10 <sup>-5</sup> M          | S8          |
| Sm-MOF                                                                            | 8.7×10 <sup>-9</sup> M          | S12         |
| Al-MIL-53-NH <sub>2</sub>                                                         | 7.56×10 <sup>-6</sup> M         | S13         |
| [Zn <sub>2</sub> (bbmb) <sub>2</sub> (tdc) <sub>2</sub> ]·2H <sub>2</sub> O       | 1.9×10 <sup>-7</sup> M          | S14         |
| {[Zn <sub>2</sub> (1,4-bpyvna)(1,3,5-BTC)(OH)]·H <sub>2</sub> O} <sub>n</sub>     | 2.9×10 <sup>-7</sup> M          | S15         |
| TMU-34(-2H)                                                                       | 1.8×10 <sup>-6</sup> M          | S16         |
| {[Cd(BIPA)(IPA)]·DMF} <sub>n</sub>                                                | 5.0×10 <sup>-7</sup> M          | S17         |
| {[Co <sub>2</sub> (L)(hfpd)(H <sub>2</sub> O)]·1.75H <sub>2</sub> O} <sub>n</sub> | 4.0×10 <sup>-6</sup> M          | S18         |
| Eu <sup>3+</sup> /CDs@MOF-253                                                     | 6.5×10 <sup>-8</sup> M          | S19         |
| PCN-221                                                                           | 1.0×10 <sup>-8</sup> M          | S20         |
| <b>JXUST-28</b>                                                                   | 9.7×10 <sup>-8</sup> M          | This work   |

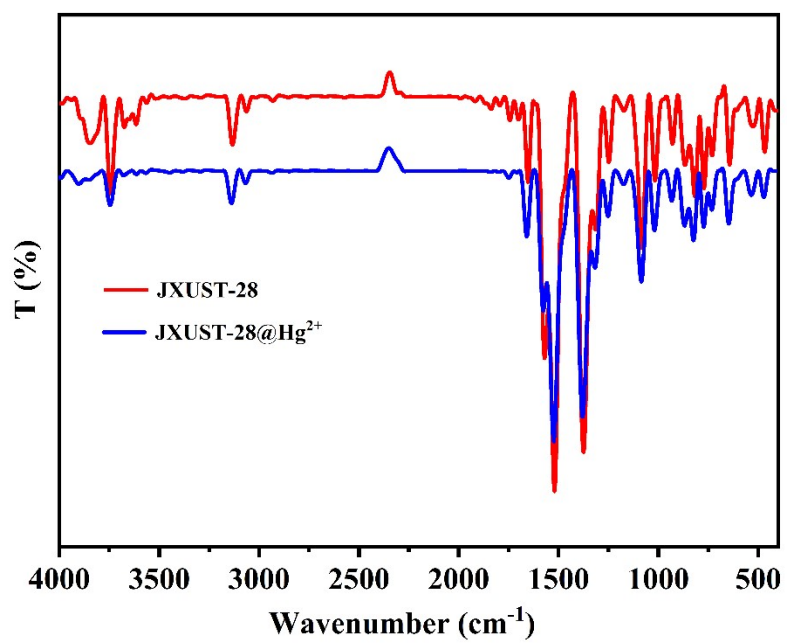

**Fig. S1** IR spectra of **JXUST-28** and **JXUST-28@Hg<sup>2+</sup>** at room temperature.

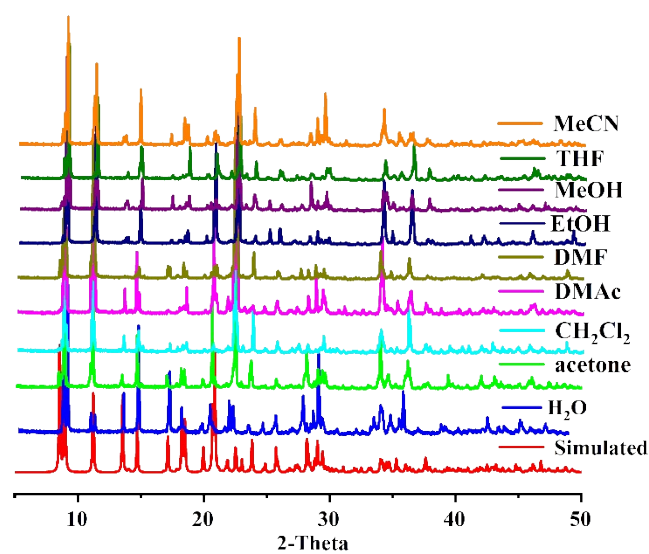

(a)

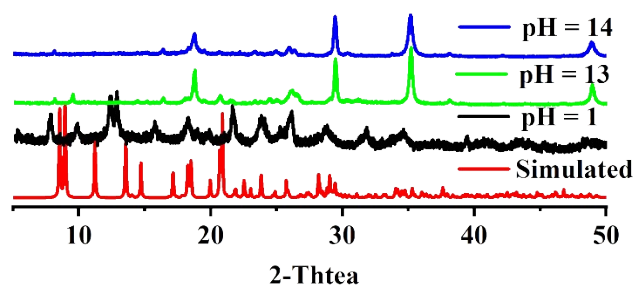

(b)

**Fig. S2** (a) The simulated and experimental PXRD patterns of **JXUST-28** soaked in common organic solvents for 24 hours; (b) the simulated and experimental PXRD patterns of **JXUST-28** soaked in the aqueous solution with pH values of 1, 13 and 14 for 24 hours.

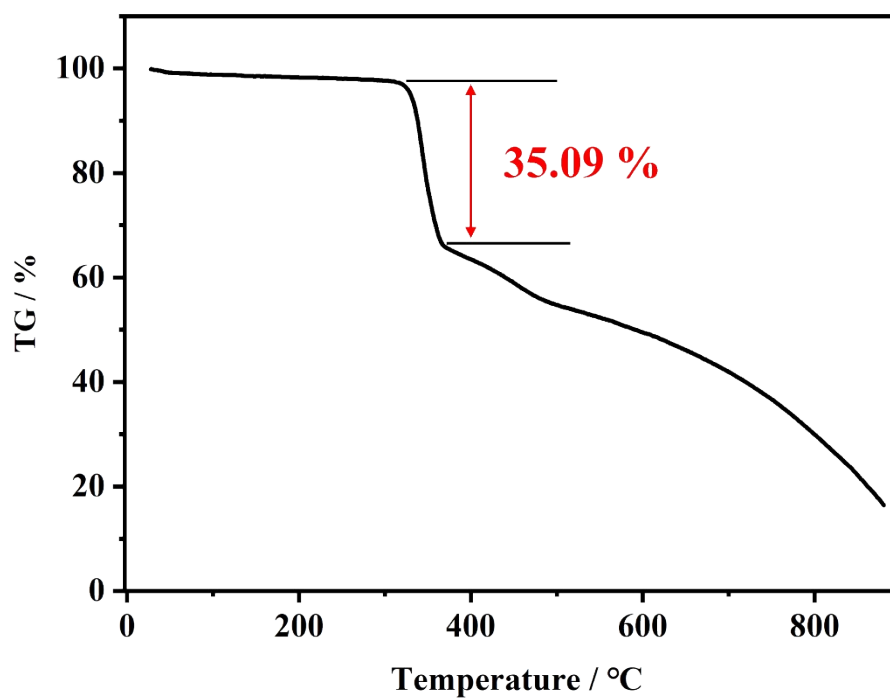

Fig. S3 The TGA curve of JXUST-28 under N<sub>2</sub> atmosphere.



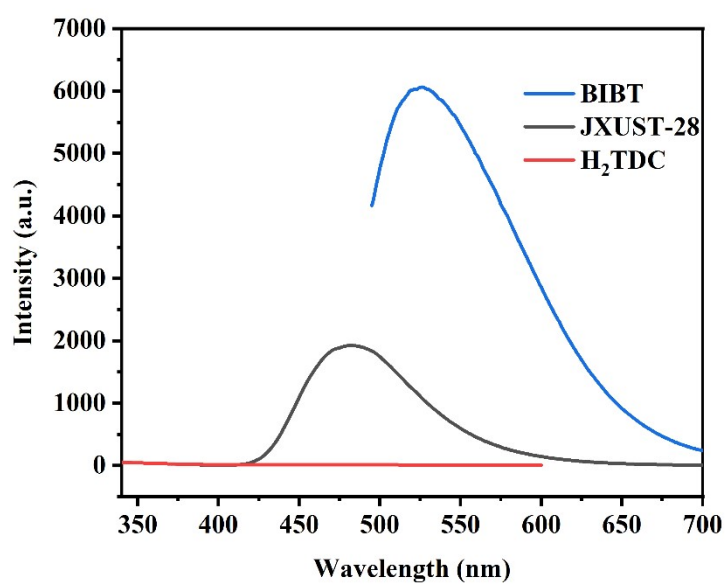

(a)

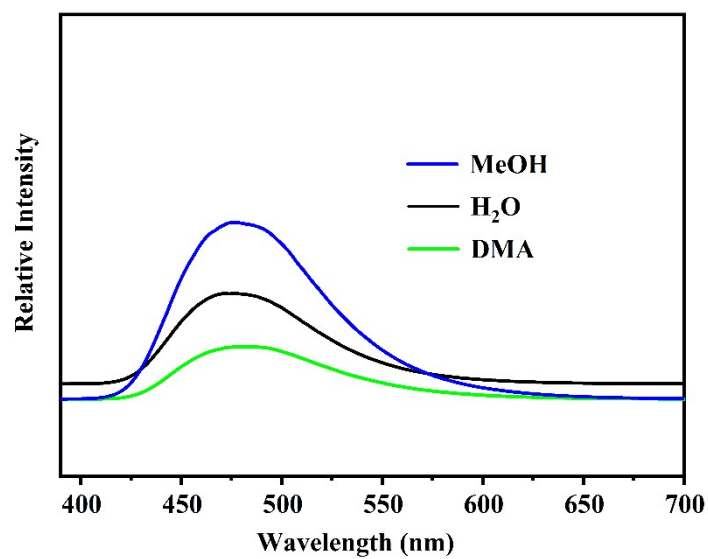

(b)

**Fig. S4** (a) Solid-state emission spectra of BIBT and JXUST-28; (b) the emission spectra of JXUST-28 in aqueous, DMA and MeOH solutions at room temperature.

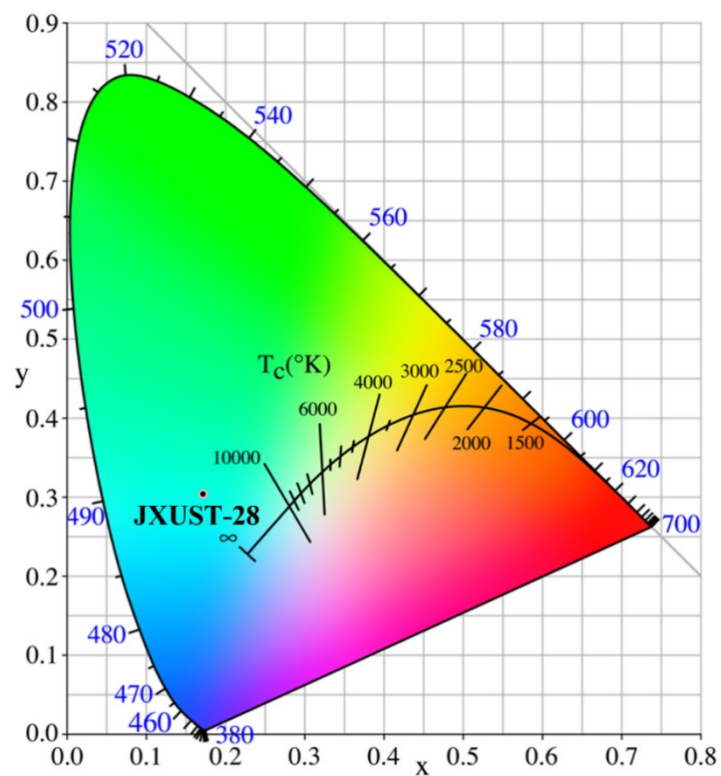

Fig. S5 CIE chromaticity diagram displaying the color coordinate of JXUST-28.

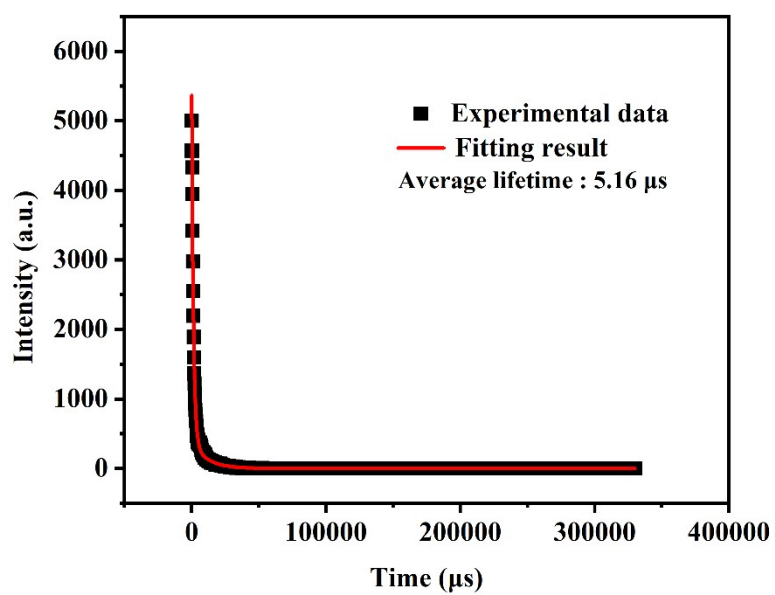

Fig. S6 The luminescence decay curve of JXUST-28.

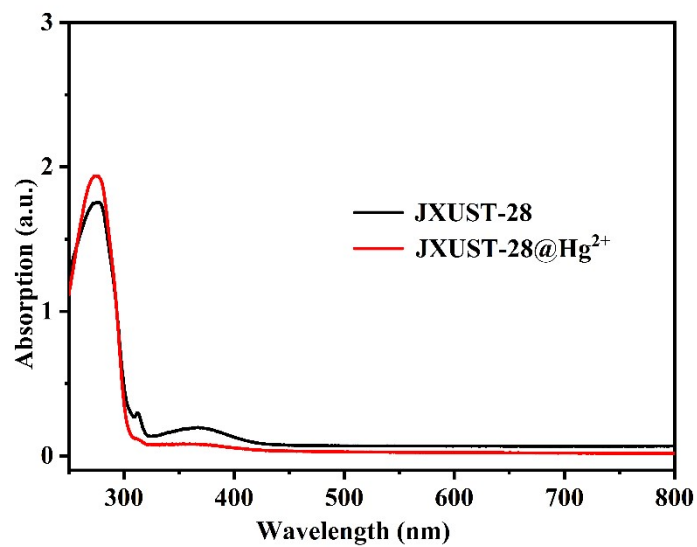

(a)

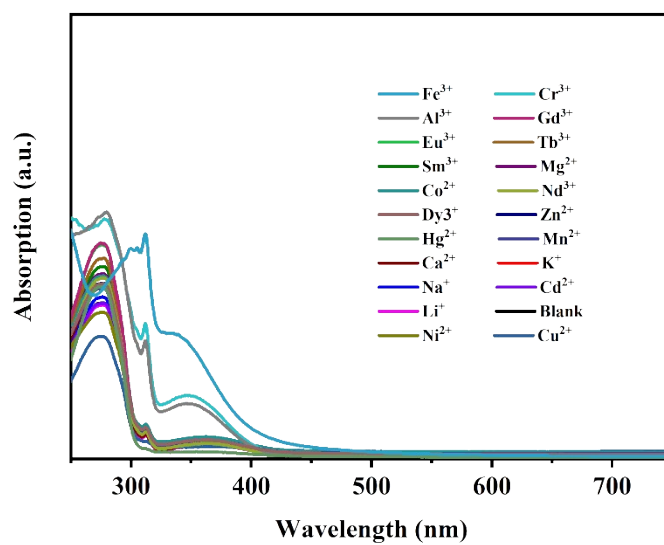

(b)

**Fig. S7** (a) UV-vis absorption spectra of **JXUST-28** and **JXUST-28@Hg<sup>2+</sup>**; (b) UV-vis absorption spectra of **JXUST-28** upon the addition of other metal ions.

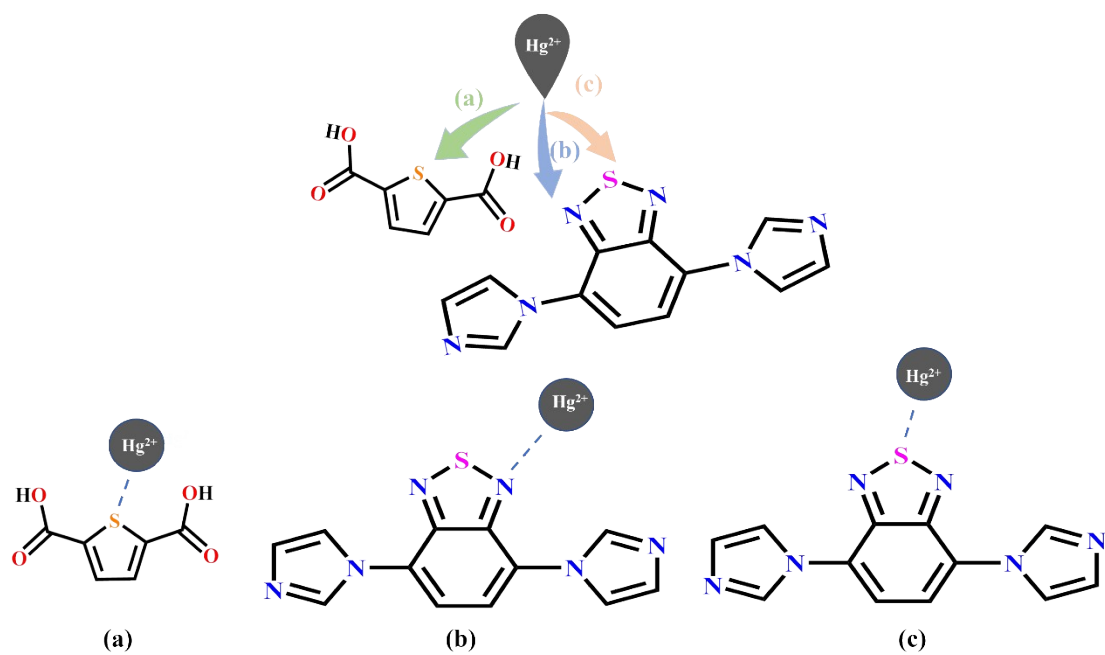

**Fig. S8** The possible weak interactions between **JXUST-28** and  $\text{Hg}^{2+}$ .

## References

- S1. L. Zhang, J. Wang, T. Du, W. Zhang, W. Zhu, C. Yang, T. Yue, J. Sun, T. Li and J. Wang, *Inorg. Chem.*, 2019, **58**, 12573-12581.
- S2. Y. X. Yu, G. L. Li, J. H. Liu and D. Q. Yuan, *Chem. Eng. J.*, 2020, **401**, 126139.
- S3. X. J. Xue, Z. C. Shao, Y. Cui, T. Y. Wen, J. S. Chen, K. S. Geng, L. W. Mi and H. W. Hou, *Cryst. Growth Des.*, 2022, **22**, 1412-1420.
- S4. Y. T. Wan, D. N. Zou, Y. J. Cui, Y. Yang and G. D. Qian, *J. Solid State Chem.*, 2018, **266**, 70-73.
- S5. T. Xia, T. Song, G. Zhang, Y. Cui, Y. Yang, Z. Wang and G. Qian, *Chem.-Eur. J.*, 2016, **22**, 18429-18434.
- S6. P. Samanta, A. V. Desai, S. Sharma, P. Chandra and S. K. Ghosh, *Inorg. Chem.*, 2018, **57**, 2360-2364.
- S7. Z. C. Shao, C. Huang, J. Dang, Q. Wu, Y. Y. Liu, J. Ding and H. W. Hou, *Chem. Mater.*, 2018, **30**, 7979-7987.
- S8. Z. Wang, J. Yang, Y. Li, Q. Zhuang and J. Gu, *Dalton Trans.*, 2018, **47**, 5570-5574.
- S9. X. Wang, Z. Jiang, C. Yang, S. Zhen, C. Huang and Y. Li, *J. Hazard. Mater.*, 2022, **423**, 126978.
- S10. A. Hakimifar and A. Morsali, *Inorg. Chem.*, 2019, **58**, 180-187.
- S11. Z. Huang, M. Zhao, C. Wang, S. Wang, L. Dai and L. Zhang, *ACS Appl. Mater. Inter.*, 2020, **12**, 41294-41302.
- S12. N. Wu, H. Guo, R. Xue, M. Wang, Y. Cao, X. Wang, M. Xu and W. Yang, *Colloid. Surface. A.*, 2021, **618**, 126484
- S13. W. Abd El-Fattah, E. S. Al-Farraj, N. B. Hamadi, A. Alharbi and A. Shahat, *ACS Omega*, 2022, **7**, 17483-17491.
- S14. W.-C. Kang, C. Han, D. Liu and G.-H. Cui, *Inorg. Chem. Commun.*, 2019, **106**, 81-85.
- S15. W.-X. Li, H.-X. Li, H.-Y. Li, M.-M. Chen, Y.-X. Shi and J.-P. Lang, *Cryst. Growth. Des.*, 2017, **17**, 3948-3959.
- S16. S. A. A. Razavi, M. Y. Masoomi and A. Morsali, *Inorg. Chem.*, 2017, **56**, 9646-9652.
- S17. Z. J. Wang, L. J. Han, X. J. Gao and H. G. Zheng, *Inorg. Chem.*, 2018, **57**, 5232-5239.
- S18. Y.-Q. Su, Y.-H. Qu, L. Fu and G.-H. Cui, *Inorg. Chem. Commun.*, 2020, **118**, 108013.
- S19. X.-Y. Xu and B. Yan, *J. Mater. Chem. C*, 2016, **4**, 1543-1549.
- S20. E. Moradi, R. Rahimi and V. Safarifard, *J. Solid State Chem.*, 2020, **286**, 121277.
